# Supplementary material
Source: PubMed Central journal article supplement (PMC3676114)
Supplement: JVI.00672-13_zjv999097723so1.pdf [file JVI.00672-13_zjv999097723so1.pdf]

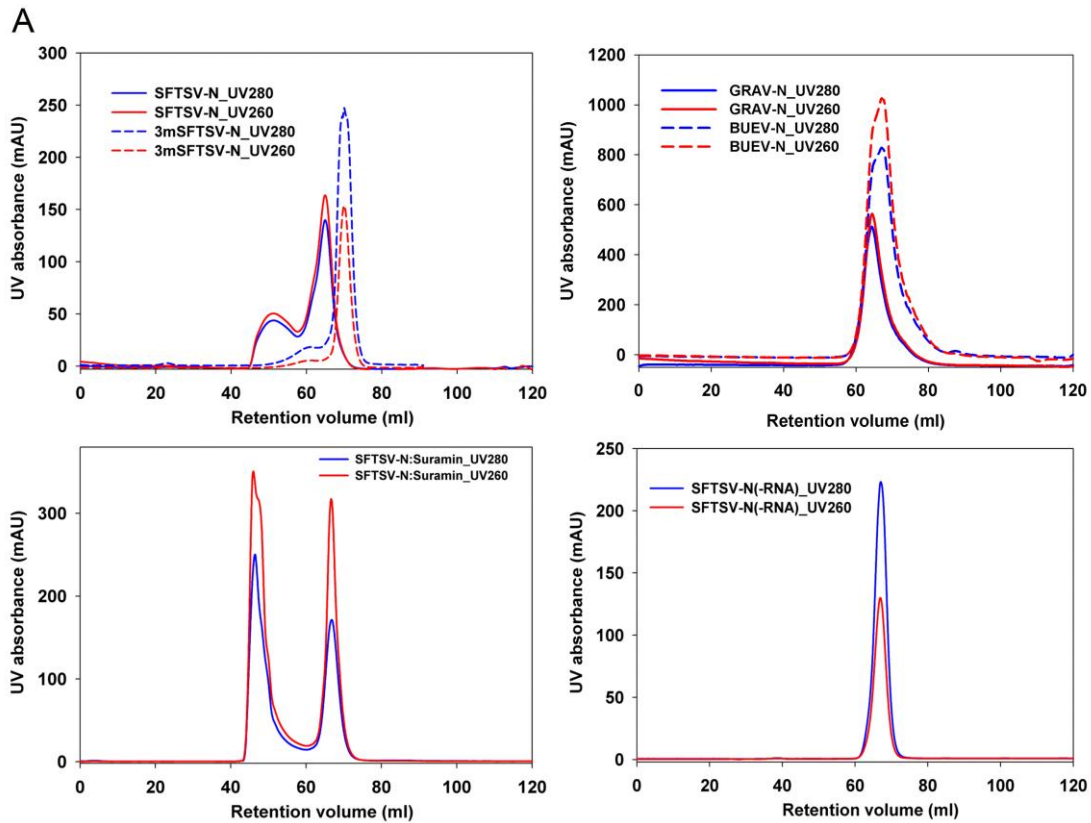

**B**

| Mutations |                   | $A_{260}/A_{280}$ | Oligomerization state |
|-----------|-------------------|-------------------|-----------------------|
| SFTSV-N   | Native WT         | 1.23              | Hexamer/Pentamer      |
|           | Partial unfolding | 0.6               | Hexamer/Pentamer      |
|           | K67Q              | 0.52              | Hexamer/Pentamer      |
|           | K67D              | 0.49              | Hexamer/Pentamer      |
|           | R64D/K67D/K74D    | 0.48              | Tetramer              |
| GRAV-N    | WT                | 1.33              | Hexamer/Pentamer      |
|           | Partial unfolding | 0.62              | Hexamer/Pentamer      |
|           | R69D/K72E/K79E    | 0.55              | Tetramer              |
| BUEV-N    | WT                | 1.31              | Hexamer/Tetramer      |
|           | Partial unfolding | 0.66              | Hexamer/Tetramer      |
|           | R63D/K66E/K73E    | 0.56              | Hexamer               |

1

2 **Figure S1** Native and mutant Ns bind with various amount of RNA from *E. coli*. (A)  
 3 Size exclusion chromatography (SEC) of SFTSV-N, GRAV-N and BUEV-N. Samples  
 4 of SFTSV-N, triple mutant SFTSV-N (3mSFTSV-N), GRAV-N and BUEV-N in  
 5 complex with *E.coli* RNA, SFTSV-N in complex with Suramin and RNA-free  
 6 SFTSV-N were injected, respectively, onto a Superdex G200 (120 ml) column. (B)  
 7  $A_{260}/A_{280}$  ratios and corresponding oligomerization states of native and mutant Ns bind  
 8 with RNA from *E. coli*.

9

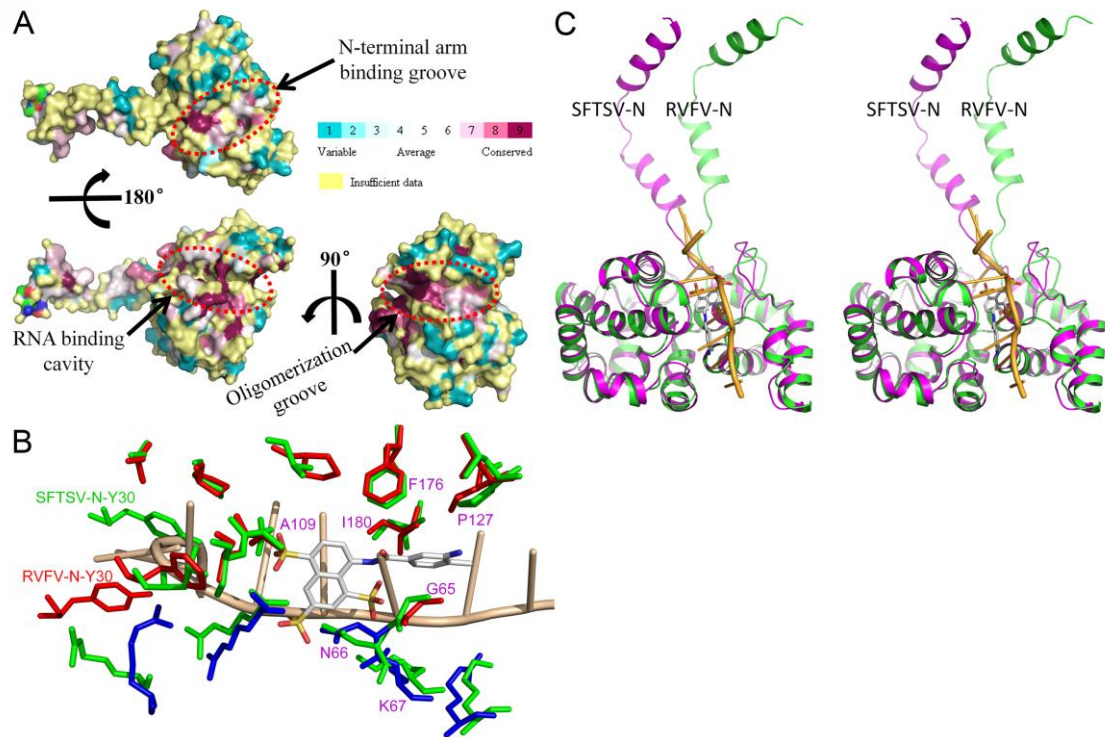

10

11 **Figure S2** Conserved structures of phleboviral Ns and comparison between  
 12 RVFV-N:RNA and SFTSV-N:Suramin complexes. (A) Residues on the surface of  
 13 RNA binding cavity, oligomerization groove, interfaces between N-terminal arm and  
 14 its binding groove are highly conserved. Amino acid conservation of phleboviral Ns is  
 15 displayed on the WT SFTSV-N structure by ConSurf (<http://consurf.tau.ac.il/>). (B)  
 16 Residues in the RNA binding cavity of RVFV-N (PDB code: 4H5O, residues  
 17 contributing to hydrophobic interactions are shown in red, while those involved in  
 18 formation of polar contacts are shown in blue) and their comparison with  
 19 corresponding residues on SFTSV-N (green). Suramin and RNA are showed in white  
 20 and light orange, separately. The magenta labels indicate the six RNA binding  
 21 residues in RVFV-N which are identical with the corresponding conserved residues  
 22 found in SFTSV-N for binding Suramin. Side chain orientation of Y30 is dependent  
 23 on the N-terminal arm flexibility. (C) Stereo view of superimposed structures of  
 24 RVFV-N: RNA complex (PDB code: 4H5O) in magenta and light orange onto  
 25 SFTSV-N: Suramin complex in green and white.

26

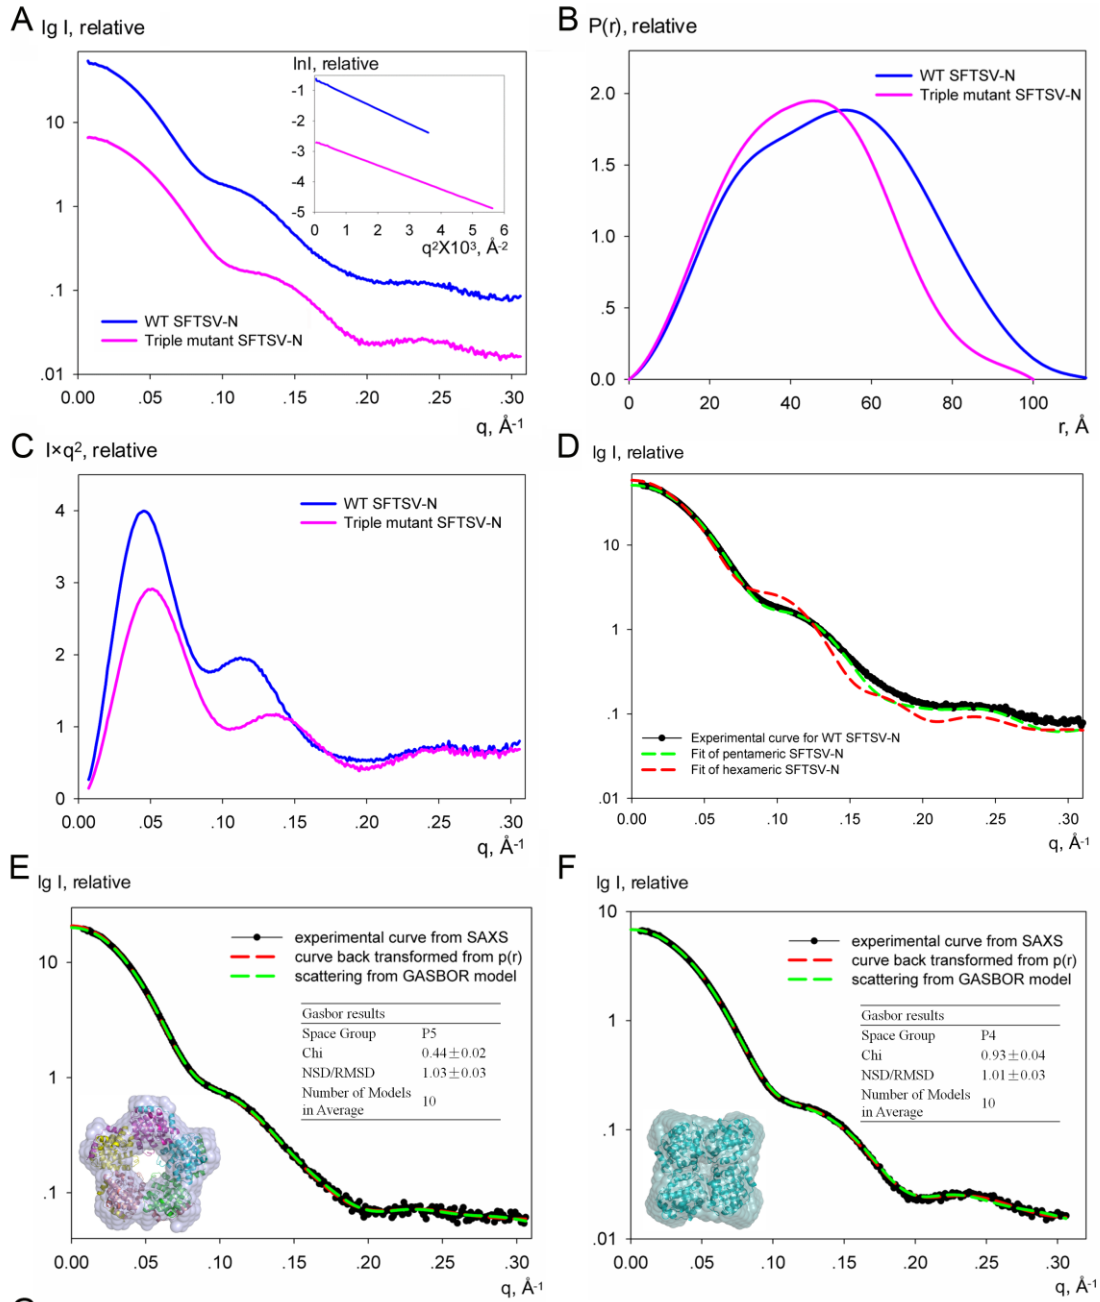

27

28 **Figure S3** SAXS analysis of WT SFTSV-N and triple mutant SFTSV-N. (A)  
 29 Scattering curves of SFTSV-N generated by averaging nine experimental datasets,  
 30 including: WT SFTSV-N (blue) and triple mutant SFTSV-N (magenta). The inset  
 31 figure is Guinier plots. The wide  $q$  range linearity in the plots,  $\ln[I(q)]$  vs  $q^2$ , suggests  
 32 that there was neither detectable inter-particle interactions nor radiation damage

33 during collection of SAXS data. (B) Pair distance distribution function,  $P(r)$ , curves.  
 34 (C) Kratky plots. The bell-shaped kratky curves demonstrate the proteins were well  
 35 folded. (D) Fits generated by CRY SOL between experimental scattering curve and  
 36 pentamer or hexamer observed in crystal packing. GASBOR models for WT  
 37 SFTSV-N (E) and triple mutant SFTSV-N (F) were obtained from averaging 10  
 38 models calculated by GASBOR individually. The crystal structures of pentameric WT  
 39 SFTSV-N and tetrameric triple mutant SFTSV-N were superimposed into the  
 40 GASBOR models by SUPCOMB. (E) Pentameric model for WT SFTSV-N with P5  
 41 symmetry as a restraint. (F) SAXS model for triple mutant SFTSV-N using P4  
 42 symmetry. The goodness-of-fitness parameter Chi and the NSD/RMSD of 10 models  
 43 are listed in the table (inset). (G) Parameters derived from SAXS curves.  $R_g$  and  $D_{max}$   
 44 are estimated by calculating  $P(r)$  using GNOM.  $V_{Porod}$  is calculated using PRIMUS.  
 45 The calculated shape  $R_g$  was generated by CRY SOL. The molecular weights (MWs)  
 46 were predicted using the web server (<http://www.if.sc.usp.br/~saxs/saxsmow.html>).  
 47 All the values with error bars are from three replicate samples.

48

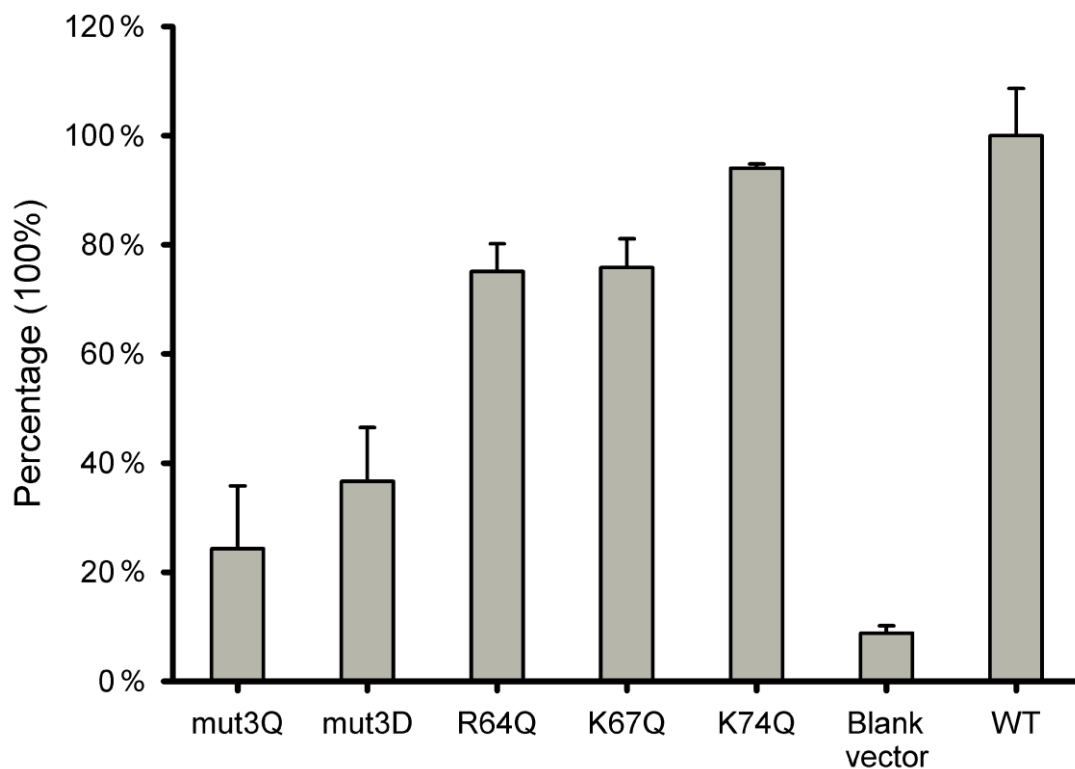

49

50 **Figure S4** Ability of WT SFTSV-N and a panel of N mutants to transcribe the M  
 51 reporter gene were evaluated by the luciferase assay in 293T cells. mut3Q:  
 52 R64Q/K67Q/K74Q; mut3Q: R64D/K67D/K74D.

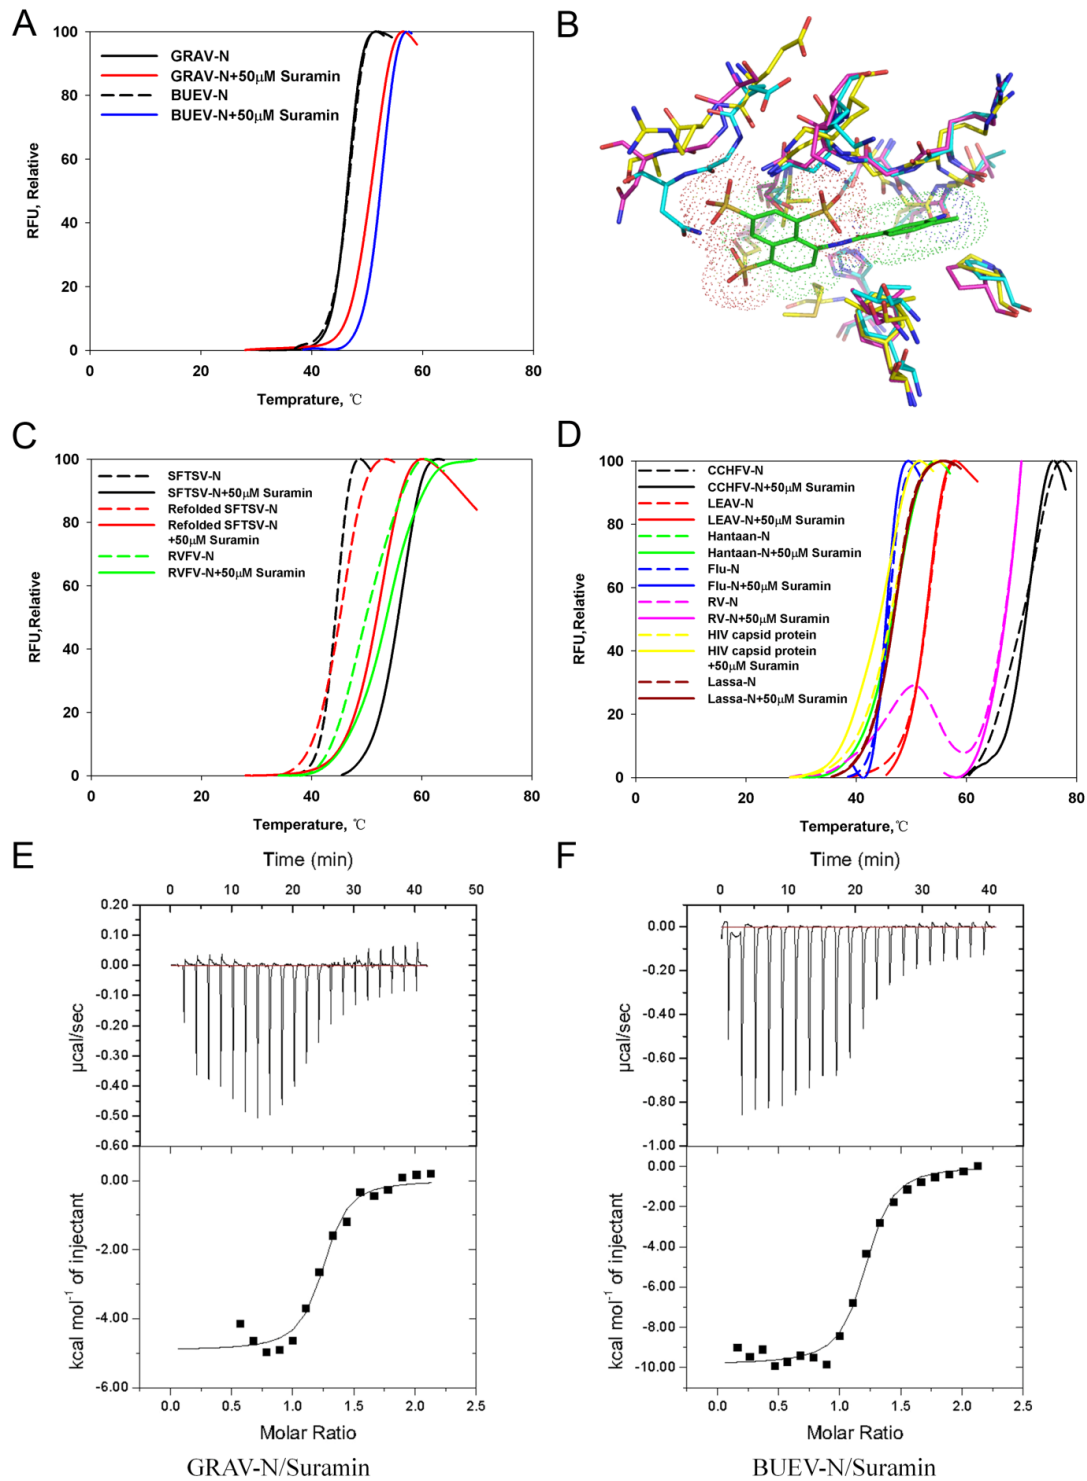

53

54 **Figure S5** Suramin specifically binds pleboviral Ns. (A) GRAV-N and BUEV-N  
 55 bind Suramin as measured by thermal shift assays. (B) The residues within 5 Å  
 56 of Suramin derived from WT SFTSV-N: Suramin complex and the corresponding  
 57 residues from GRAV-N and BUEV-N. Specificity of Suramin for (C) Bunyavirus Ns  
 58 and (D) N from other viruses as measured by thermal shift assays. LEAV-N: Leayer  
 59 virus N (*Orthobunyavirus* genus); Hantaan-N: Hantaan virus N (*Hantavirus* genus);

60 flu-N: Influenza A virus N; RV-N: Rabies virus N; Lassa-N: Lassa virus N. (E)

61 GRAV-N and (F) BUEV-N bind with Suramin as confirmed by ITC.

62

63

64

65 TABLE S1 SFTSV N-N protomer interface hydrogen bonds (distances  $\leq 3.2$  Å)

66

| <b>N-N<br/>protomer</b>              | <b>Chain A<br/>residue/atom</b> | <b>Chain B<br/>residue/atom</b> | <b>Hydrogen bond<br/>Distance (Å)</b> |
|--------------------------------------|---------------------------------|---------------------------------|---------------------------------------|
| <b>WT<br/>SFTSV-N<br/>(P6)</b>       | SER5/OG                         | PHE209/O                        | 2.53                                  |
|                                      | GLN14/OE1                       | LYS55/NZ                        | 2.77                                  |
|                                      | GLU20/OE2                       | LYS52/NZ                        | 2.28                                  |
|                                      | ARG26/NH1                       | TYR125/OH                       | 3.07                                  |
|                                      | GLU27/O                         | SER76/OG                        | 2.74                                  |
|                                      | LEU29/O                         | ARG64/NH1                       | 2.69                                  |
|                                      | GLU31/N                         | LYS74/O                         | 2.96                                  |
|                                      | ARG99/NH1                       | MET75/O                         | 2.45                                  |
|                                      | ARG99/NH2                       | MET75/O                         | 2.77                                  |
|                                      | ARG99/NH2                       | SER72/O                         | 3.00                                  |
| <b>Triple<br/>mutant<br/>SFTSV N</b> | ASP64/OD2                       | LEU28/O                         | 2.76                                  |
|                                      | ASP74/O                         | ARG99/NH2                       | 2.79                                  |
|                                      | ASP74/OD1                       | GLY32/O                         | 3.00                                  |
|                                      | SER76/OG                        | GLU27/O                         | 2.55                                  |
|                                      | LYS184/O                        | ASN182/ND2                      | 2.71                                  |
|                                      | PHE209/O                        | SER5/OG                         | 2.80                                  |

67

68

69 TABLE S2 Residues in the RNA binding cavity of RVFV-N and their comparison  
 70 with corresponding residues on SFTSV-N, GRAV-N and BUEV-N.

71

| SFTSV-N | GRAV-N | BUEV-N | RVFV-N |
|---------|--------|--------|--------|
| Y30     | Y32    | Y29    | Y30    |
| L33     | F35    | F32    | F33    |
| G65     | G70    | G64    | G65    |
| Q109    | A114   | A108   | A109   |
| S110    | A115   | A109   | A110   |
| L126    | L131   | L125   | L126   |
| P127    | P132   | P126   | P127   |
| A148    | P153   | P146   | P147   |
| F177    | F182   | F175   | F176   |
| I181    | I186   | I179   | I180   |
| P200    | P205   | P198   | P199   |
| A203    | A208   | A201   | A202   |
| N66     | N71    | N65    | N66    |
| K67     | K72    | K66    | K67    |
| K70     | K75    | K69    | R70    |
| R99     | R104   | R98    | R99    |
| R106    | R111   | R105   | R106   |

72 The six residues in red color are responsible to bind both Suramin and RNA  
 73 potentially.

74  **Strictly conserved residues.**

75  **Conserved residues.**

76

77

78



79 TABLE S3 Residues of SFTSV-N contact with Suramin within 5.0 Å and their  
 80 comparison with corresponding residues on GRAV-N, BUEV-N and RVFV-N.

81

| SFTSV-N | GRAV-N | BUEV-N | RVFV-N |
|---------|--------|--------|--------|
| A61     | N66    | S60    | A61    |
| L62     | L67    | L61    | L62    |
| T63     | V68    | T62    | T63    |
| R64     | R69    | R63    | R64    |
| G65     | G70    | G64    | G65    |
| N66     | N71    | N65    | N66    |
| K67     | K72    | K66    | K67    |
| E94     | E99    | S93    | E94    |
| R95     | G100   | G94    | G95    |
| A96     | N101   | N95    | N96    |
| V105    | S110   | S104   | S105   |
| Q109    | A114   | A108   | A109   |
| P127    | P132   | P126   | P127   |
| M147    | H152   | H145   | H146   |
| F177    | F182   | F175   | F176   |
| I181    | I186   | I179   | I180   |

82 The six residues in red color are responsible to bind both Suramin and RNA  
 83 potentially.

84

 **Strictly conserved residues.**

85

 **Conserved residues.**

86

87 **Movie legends**

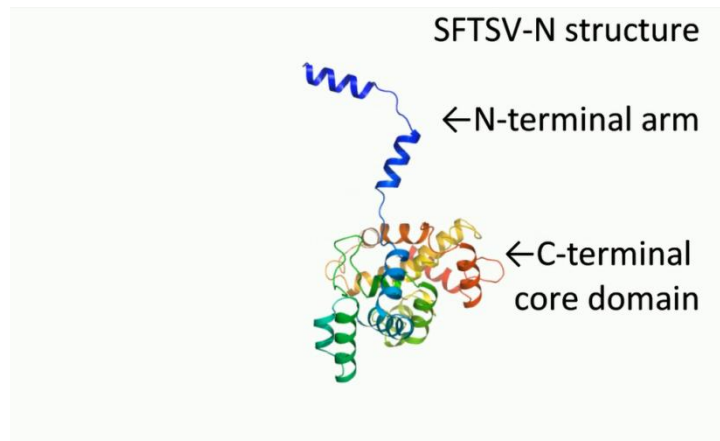

88

89 **Movie S1:** SFTSV-N wild type and triple mutant monomer structures. Three  
90 mutated residues are shown as sticks.

91

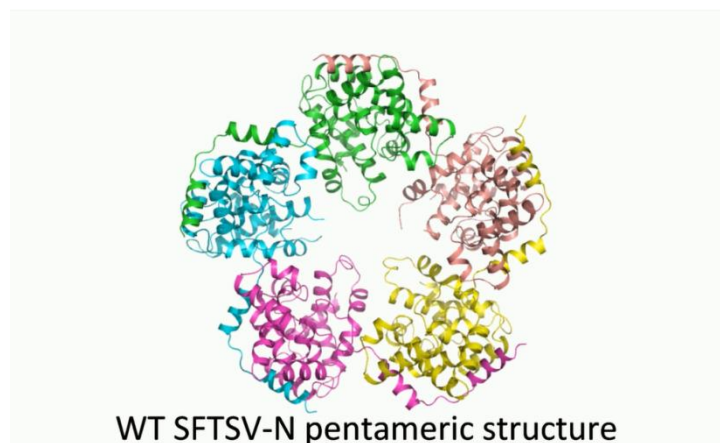

92

93 **Movie S2:** The wild type SFTSV-N pentamer structure is shown as ribbon and  
94 electrostatic potential surface representation.

95

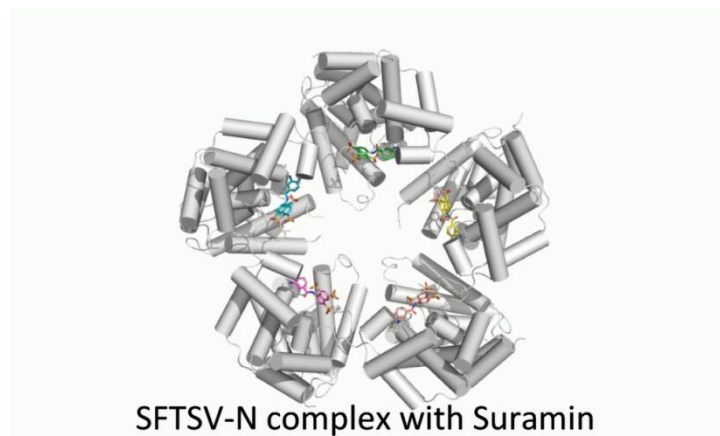

96

97 **Movie S3:** SFTSV-N complex with Suramin and detailed interactions are shown.
